# Supplementary material
Source: PubMed Central journal article supplement (PMC2845943)
Supplement: supp_mol.109.060715_SupplementalData.pdf [file supp_mol.109.060715_SupplementalData.pdf]

## **A Dietary Agonist of TRPV3 Elicits Endothelium-Dependent Vasodilation**

Scott Earley, Albert L. Gonzales, and Zarine I. Garcia

Vascular Physiology Research Group  
Department of Biomedical Sciences  
Colorado State University  
Fort Collins, CO 80523-1680, USA

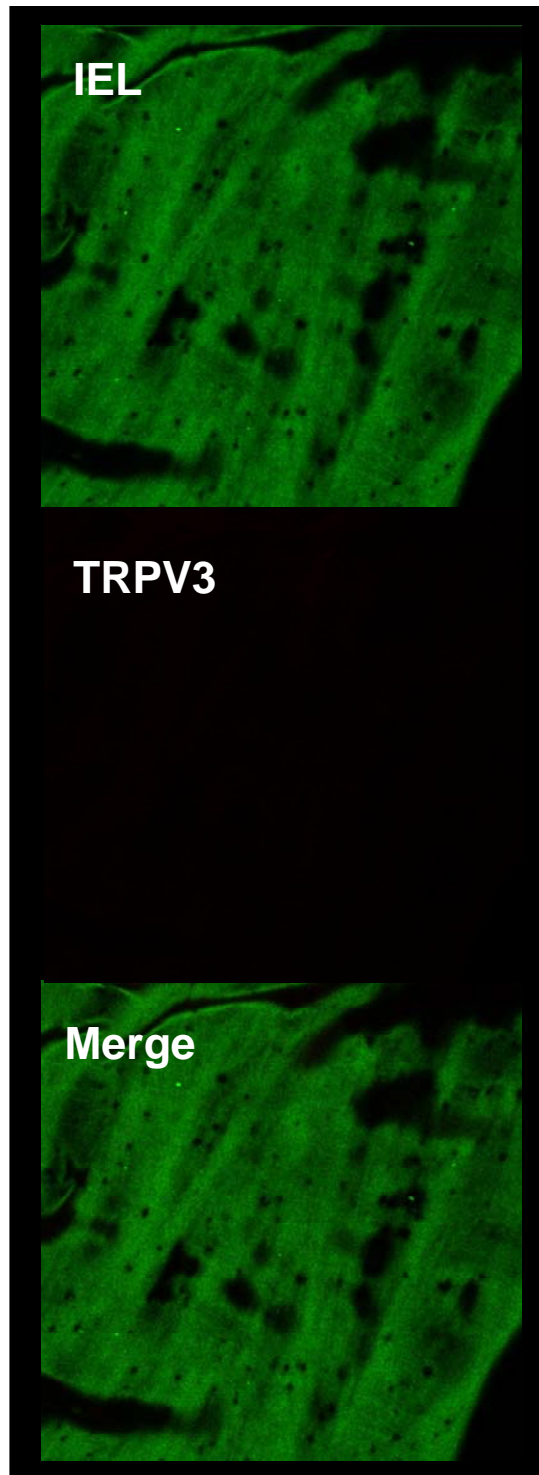

**Earley et al. Supplemental Figure 1: Mechanical Disruption of the Endothelium Abolishes TRPV3 Immunostaining.**

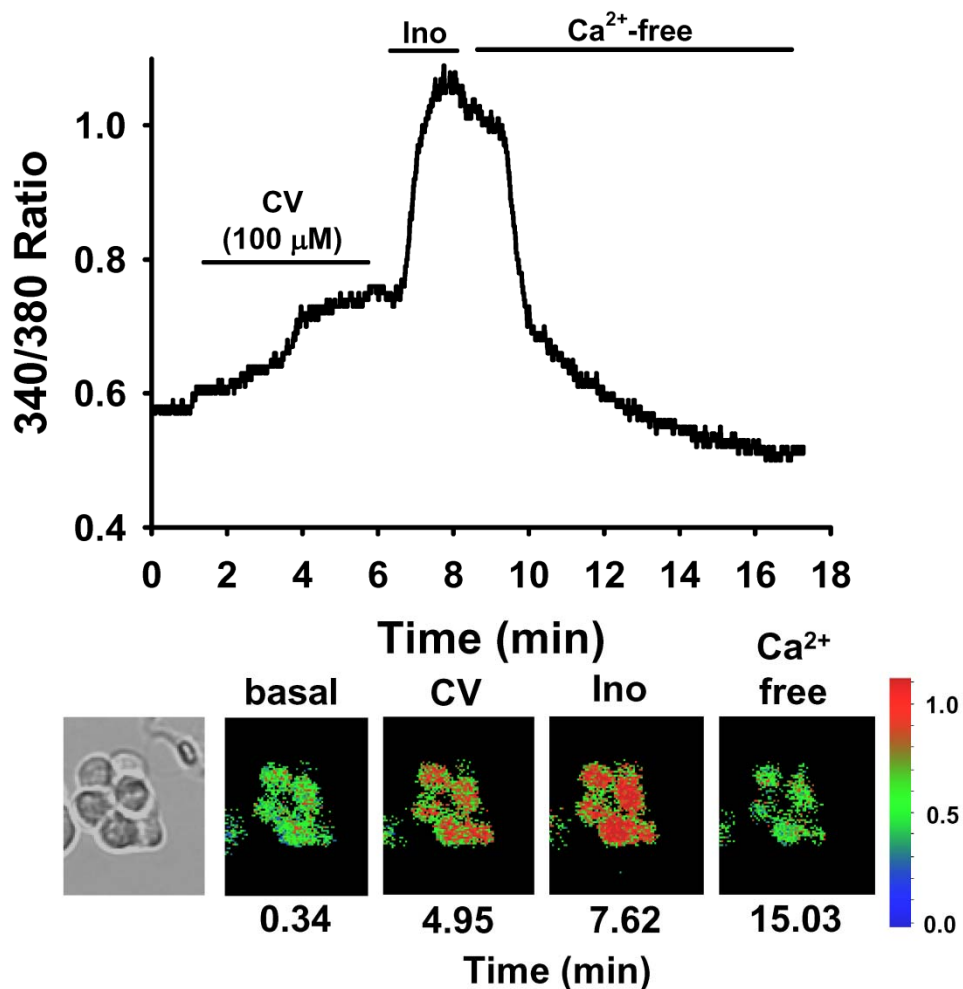

**Earley et al. Supplemental Figure 2: Ca<sup>2+</sup> Imaging of Cerebral Artery Endothelial Cells.** *Top: Example recording. Bottom: Representative images taken at the indicated time points.* Rat cerebral arteries were harvested and enzymatically dispersed. Cells were loaded with the ratiometric Ca<sup>2+</sup> indicator dye Fura-2AM (10 μM, 30 minutes) Endothelial cells were identified based on their characteristic cobblestone morphology, imaged, and individual cells were selected as regions of interest. Ca<sup>2+</sup> levels were recorded under basal conditions and during agonist (CV, 100 μM) stimulation. After steady-state conditions were achieved, cells were exposed to the Ca<sup>2+</sup> ionophore ionomycin (Iono) (1 μM) followed by Ca<sup>2+</sup>-free bathing solution (3 mM EGTA).

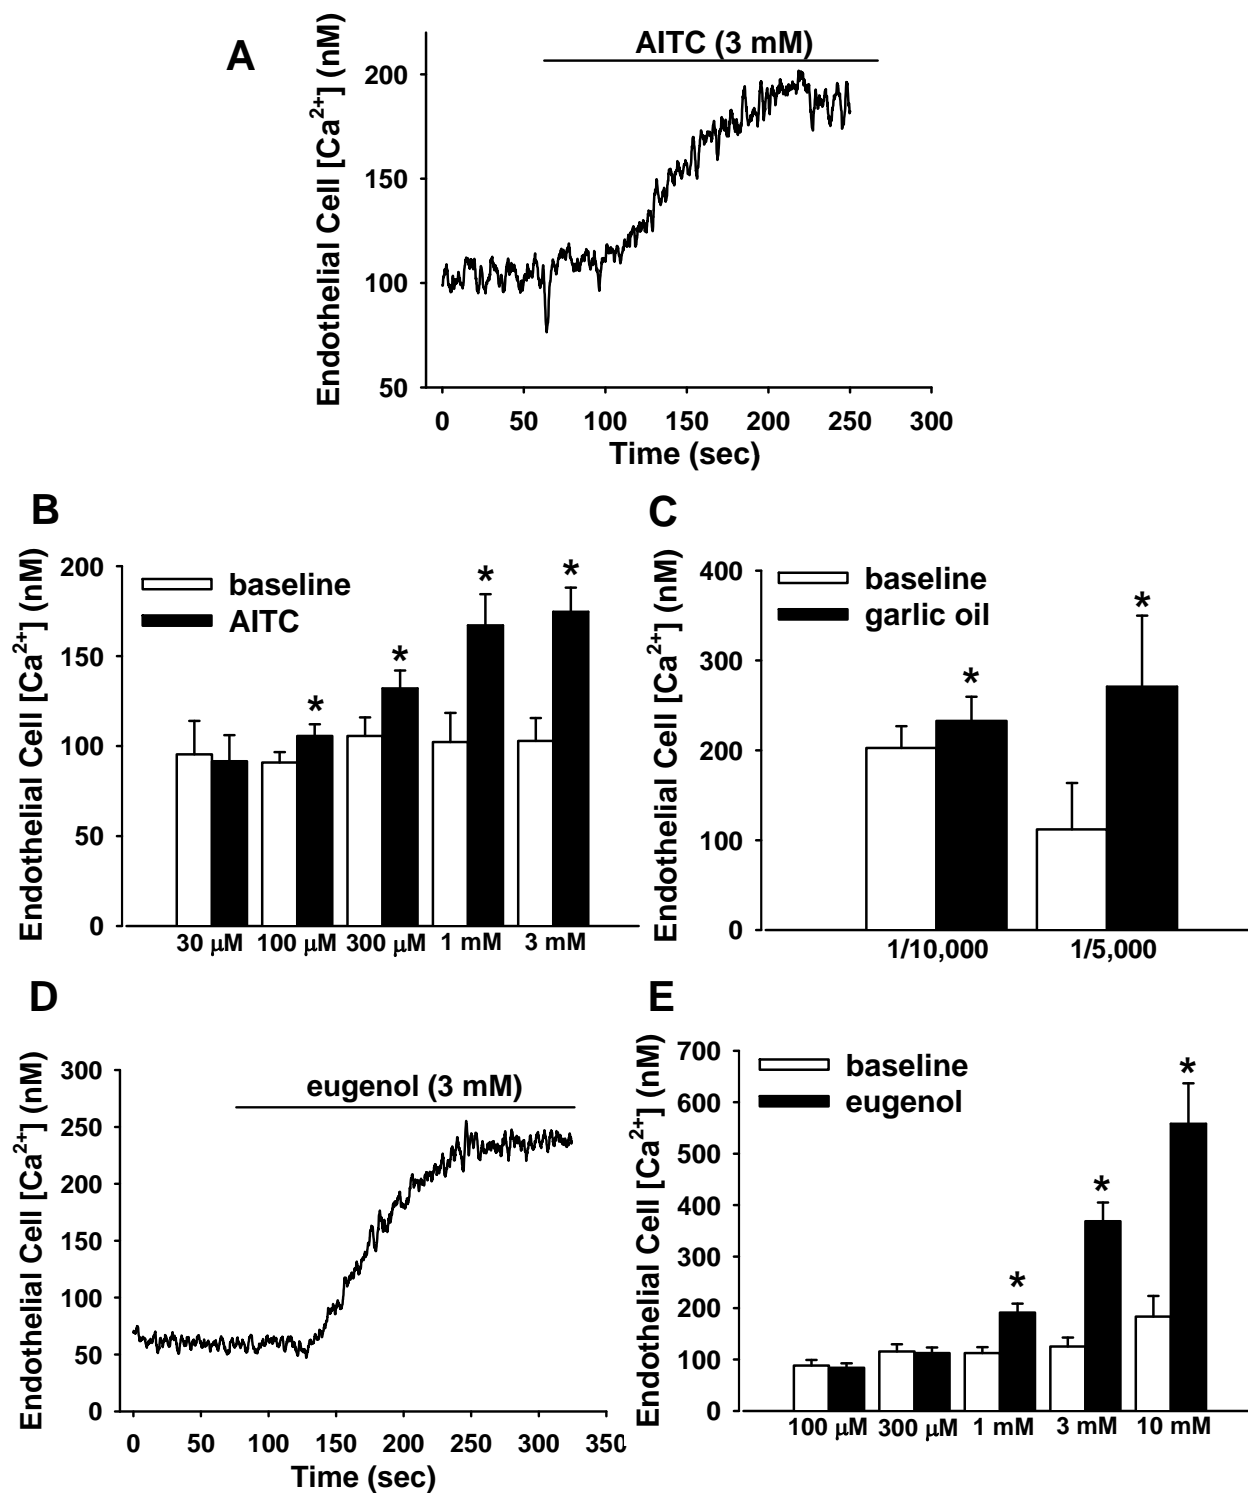

**Earley et al. Supplemental Figure 3: Selective Agonists of TRPA1 and TRPV3 Promote  $Ca^{2+}$  Influx in Freshly Isolated Cerebral and Cerebellar Artery Endothelial Cells**

A: Representative recording of increases in endothelial cell  $[Ca^{2+}]$  in response to AITC (3 mM). B: Endothelial cell  $[Ca^{2+}]$  before and after administration of AITC. \* $P \geq 0.05$  vs. baseline.  $n = 6-24$  cells per group C: Changes in endothelial cell  $[Ca^{2+}]$  in response to 1/10,000 and 1/5000 dilutions of garlic oil in PSS. \* $P \geq 0.05$  vs. baseline.  $n=3$  (1/5000 dilution),  $n=6$  (1/10,000 dilution). D: Representative recording of increases in endothelial cell  $[Ca^{2+}]$  in response to eugenol (3 mM). E: Endothelial cell  $[Ca^{2+}]$  before and after administration of eugenol. \* $P \geq 0.05$  vs. baseline.  $n = 3-17$  cells per group.

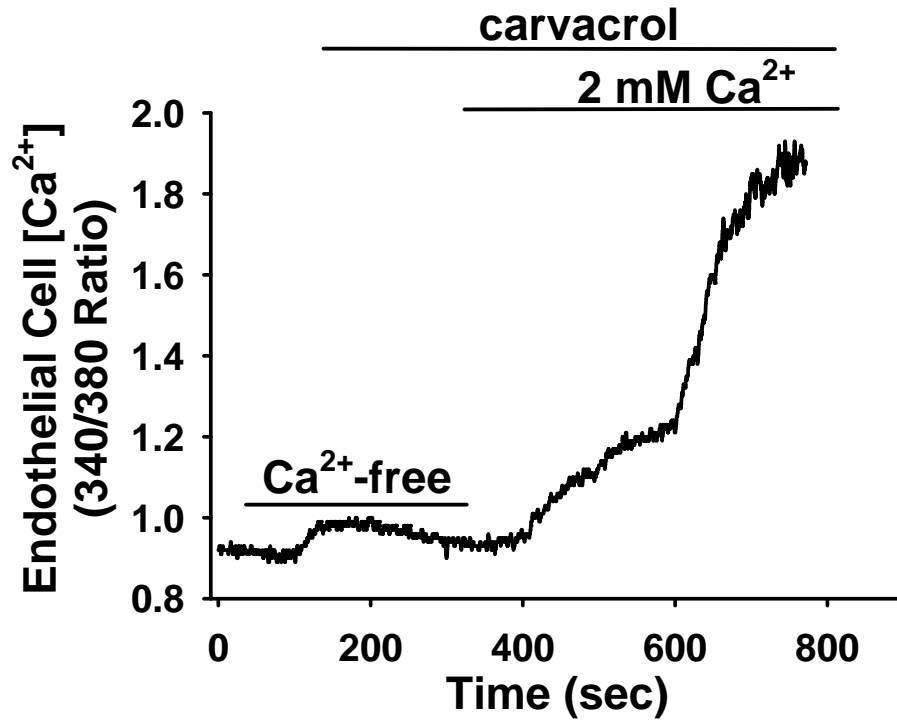

Earley et al. Supplemental Figure 4: Representative Recording Demonstrating the Effects of Removing  $Ca^{2+}$  From the Bathing Solution on Carvacrol-induced Increases in Endothelial Cell  $[Ca^{2+}]$ . Representative of 3 experiments

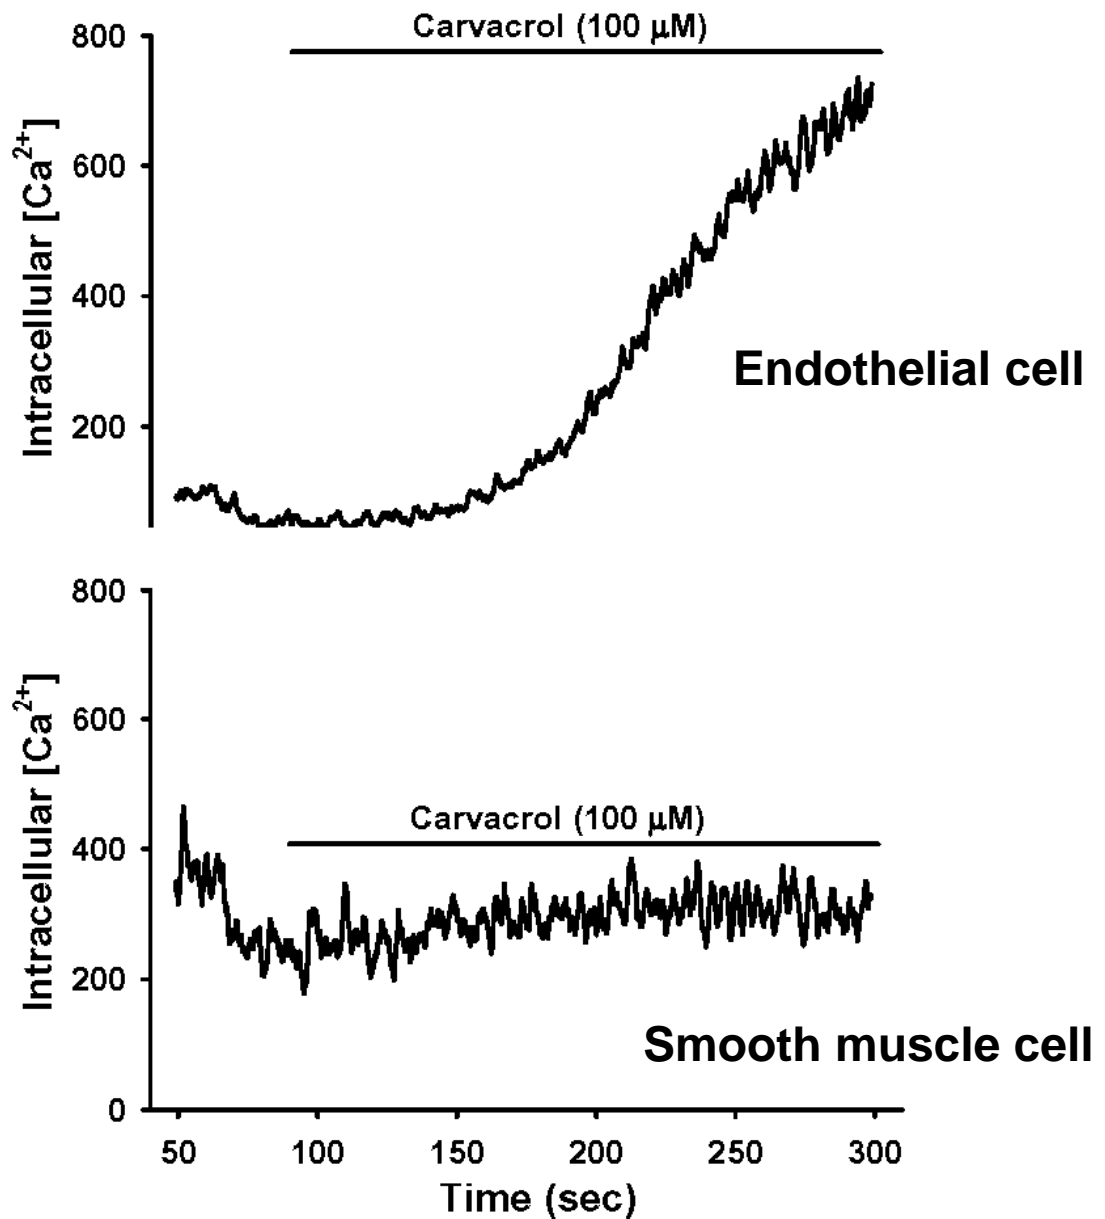

Earley et al. Supplemental Figure 5: Simultaneous Recordings of Changes in Intracellular Ca<sup>2+</sup> in Response to Carvacrol in an Endothelial Cell (top) and a Vascular Smooth Muscle Cell (bottom).

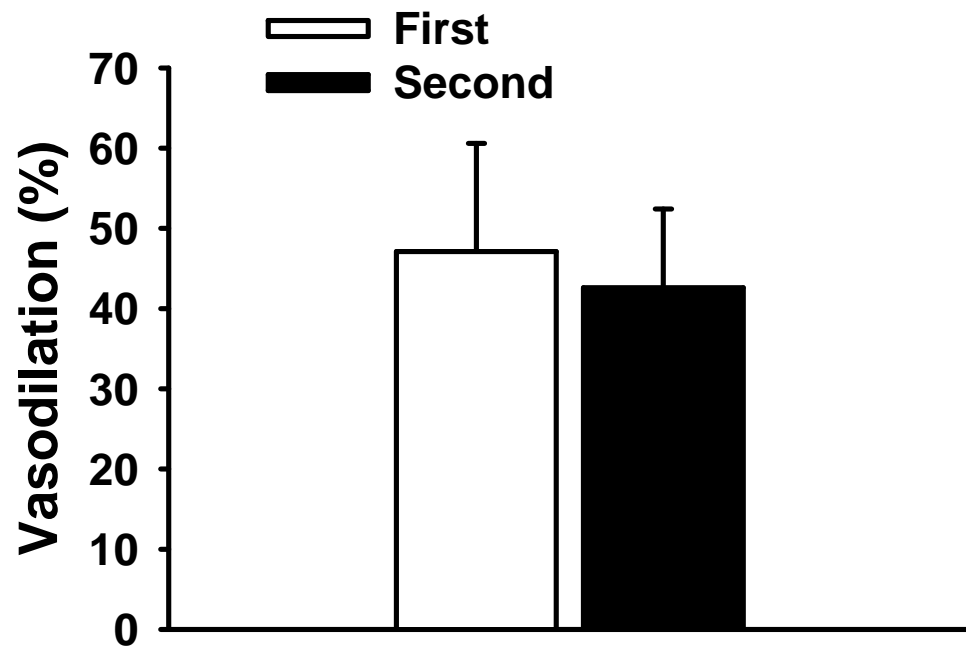

**Earley et al. Supplemental Figure 6: Reproducibility of Carvacrol-Induced Vasodilation. n=5.**  
There are no significant differences.

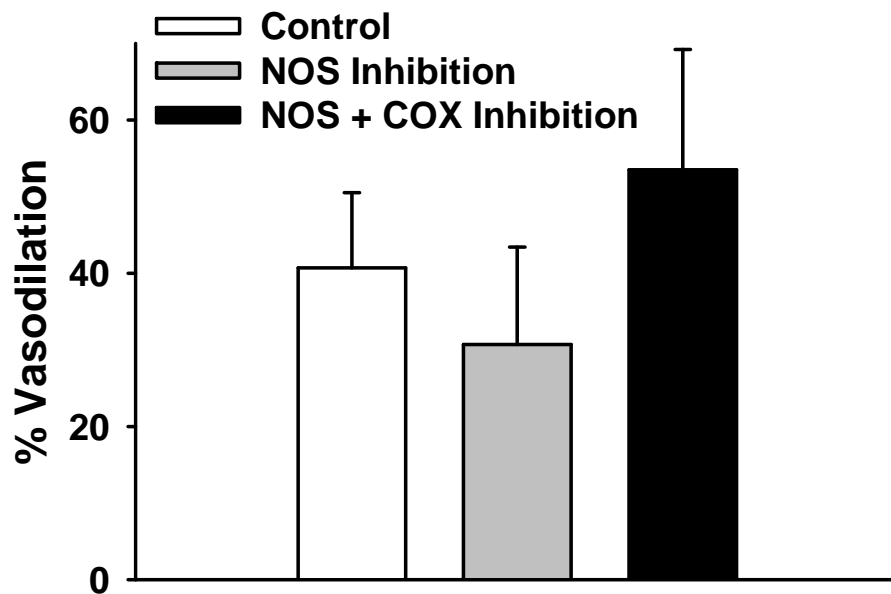

**Earley et al. Supplemental Figure 7:** Effects of nitric oxide synthase (NOS) inhibition and combined NOS and cyclooxygenase (COX) inhibition on carvacrol-induced dilation. There were no significant differences. n= 5.
